# Supplementary material for: Catalyst-free photochemical CO2 hydrogenation to CO and CH4 conversion to C2H6
Source: Royal Society of Chemistry journal article supplement (doi:10.1039/d4gc01820f), 2024-01-01
Supplement: d4gc01820f1.pdf [file d4gc01820f1.pdf]

## **Supporting Information**

**Catalyst-free photochemical CO<sub>2</sub> hydrogenation to CO and CH<sub>4</sub>  
conversion to C<sub>2</sub>H<sub>6</sub>**

## Experimental Procedures

### Chemicals

H<sub>2</sub>SO<sub>4</sub> (AR) and CH<sub>3</sub>COOH (AR) were purchased from Sinopharm Chemical Reagent Co., Ltd. Ammonium acetate (99.99%) was obtained from Aladdin Chemical Reagent, Ltd. Acetylacetone (99.5%) was provided by Alfa Aesar Chemical Co. Ltd. CO<sub>2</sub> (99.995%), CH<sub>4</sub> (99.995%) and Ar (99.9995%) were provided by Air Liquid Houlding Co., Ltd., China. H<sub>2</sub> (99.99%) was obtained from Shanghai Chemistry Industrial Zone Pujiang Special Type Gas Co., Ltd. Deionized (DI) water was used in the all the experiments.

### Performance test

The photochemical reaction was conducted in a home-made quartz reactor (220 mL) at standard room temperature, and a 172 nm-140 W Xe<sub>2</sub> excimer lamp was employed as the light source (ZIBOR UV. Co., Ltd.) without any extra energies.

For CO<sub>2</sub> hydrogenation, in a typical process, prior to illumination reaction, the reactor was evacuated by a vacuum pump, and then filled with Ar gas to attain atmospheric pressure. This evacuation-filling operation was repeated three times. Subsequently, 100 mL of CO<sub>2</sub>/H<sub>2</sub> mixture with known volume ratio was introduced into the reactor. Throughout the experiment, the reactor was enveloped with aluminum foil to avoid any external light interference. The reaction was stopped after desired time. H<sub>2</sub>O-promoted CH<sub>4</sub> conversion was conducted via nearly the same procedure; and the major difference was the feedstock employed.

The gaseous products such as CO, C<sub>2</sub>H<sub>6</sub>, H<sub>2</sub> and CH<sub>4</sub> were analyzed by a gas chromatograph (Agilent GC-8860) equipped with a thermal conductivity detector (TCD), flame ionization detector (FID) and a methanizer which contains Ni catalyst and calibrated with a standard gas mixture. The amount of H<sub>2</sub> was quantified on the TCD using a Molsieve 5Å column. The amount of C<sub>2</sub>H<sub>6</sub> was measured on the FID using a Hayesep Q column. The amount of CO and CH<sub>4</sub> was quantified on the FID using a Molsieve 5Å column. The role of methanizer is to convert CO to CH<sub>4</sub> for FID analysis. Meanwhile, hydrocarbons such as C<sub>3</sub>H<sub>8</sub> were analyzed by a gas chromatograph (Agilent GC-7890A) equipped with a TCD and FID and calibrated with a standard gas mixture. The amount of hydrocarbons such as C<sub>3</sub>H<sub>8</sub> was determined on the FID using a HP-AL/S column. Meanwhile, to detect liquid products, 10 mL of H<sub>2</sub>O was injected into the system after the reaction. Possible liquid products such as methanol, ethanol, acetic acid, and acetaldehyde were measured using an Agilent Technology 7890B gas chromatography system with a flame ionization detector using an DB-WAX-UI column. The possible product of formic acid was analyzed by HPLC (Waters 2695) equipped with Aminex HPX-87H column, UV/visible detector (WATER2489), and using 5 mM sulfuric acid as the mobile phase with a flow rate of 0.7 mL/min. The amount of HCHO was analyzed by using the acetylacetone colour-development method. Specifically, 1 mL of the as-prepared acetylacetone solution was mixed with 4 mL of the aqueous solution with product in a glass bottle, and heated for 5 min in boiling water, then the yellow colour of the mixed solution could be investigated. Afterwards, desired amount of solution was taken out and measured by using a

Shimadzu UV-2700 spectrophotometer. Through the absorbance intensity at 413 nm, the HCHO concentration was obtained. Typically, 100 mL of acetylacetone solution was first prepared by dissolving 15 g of ammonium acetate, 0.3 mL of acetic acid, and 0.2 mL of acetylacetone in water, and was stored in refrigerator with 2-6 °C.

### Quantum efficiency (QE) calculation

The QE for CO evolution for CO<sub>2</sub> hydrogenation and C<sub>2</sub>H<sub>6</sub> evolution for H<sub>2</sub>O-promote CH<sub>4</sub> conversion was measured using the standard experimental setup. The system was irradiated by a 172 nm-140 W Xe<sub>2</sub> excimer lamp for 24 h. The average intensity of irradiation ( $I$ ) was 0.9 mW cm<sup>2</sup>, which was determined by a UIT-250(USHIO) unimeter. The irradiation area ( $S$ ) was measured to be 19.63 cm<sup>2</sup>.  $E_\lambda$  is given by  $hc/\lambda$  ( $\lambda = 172$  nm). The QE was calculated by the following equation.

$$QE(CO) = \frac{2 \times \text{the number of evolved CO molecules}}{I (W/cm^2) \times S(cm^2) \times t(s)/E_\lambda(J)} \times 100\%$$

$$QE(C_2H_6) = \frac{2 \times \text{the number of evolved C}_2\text{H}_6 \text{ molecules}}{I (W/cm^2) \times S(cm^2) \times t(s)/E_\lambda(J)} \times 100\%$$

### Characterization

The temperature was recorded by an infrared thermal imaging camera (Fotrpic 315, Shanghai Thermal Imaging Technology Co., Ltd.). *In-situ* FT-IR spectra were recorded using a NICOLET iS50 FT-IR spectrometer (Thermo SCIENTIFIC, USA) equipped with a high-temperature reaction chamber and a mercury cadmium telluride (MCT) detector at a resolution of 4 cm<sup>-1</sup> and 32 scans per spectrum.

For CO<sub>2</sub> hydrogenation, the background spectrum was recorded after the introduction of the gas mixture (66%CO<sub>2</sub>/33%H<sub>2</sub>).

Similarly, for H<sub>2</sub>O-promoted CH<sub>4</sub> conversion, the background spectrum was collected after introducing moist CH<sub>4</sub> gas into the testing chamber.

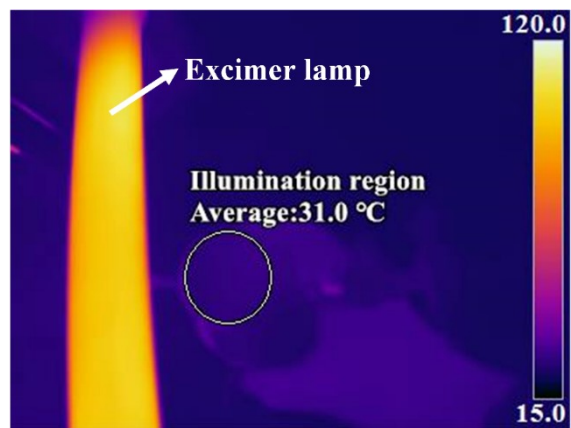

**Figure S1** Infrared thermal images captured for the illumination region of the reactor.

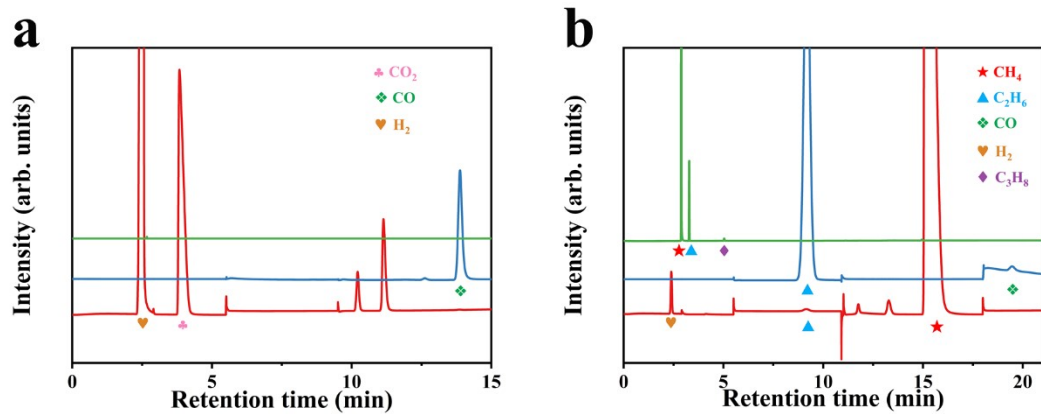

**Figure S2** Typical GC curve of the sample: (a) CO<sub>2</sub> hydrogenation and (b) H<sub>2</sub>O-promoted CH<sub>4</sub> conversion. Reaction conditions: 172 nm-140 W Xe<sub>2</sub> excimer lamp, irradiation time 24 hours, ambient temperature; total volume of reaction gas 100 mL and volume ratio (CO<sub>2</sub>/ H<sub>2</sub> =2/1) for Figure S2a; volume of reaction gas 220 mL and volume of water (1 mL) for Figure S2b.

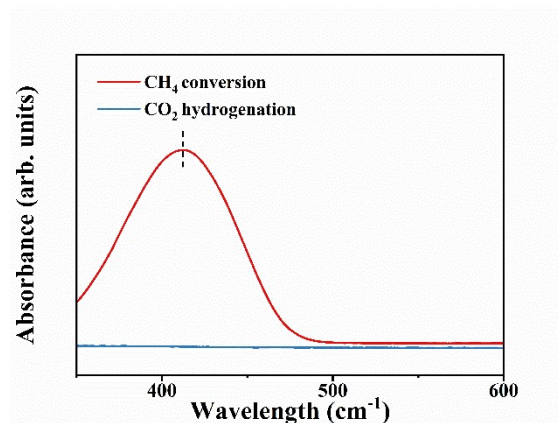

**Figure S3** Ultraviolet-visible absorption spectrum of the reaction mixture from CO<sub>2</sub> hydrogenation (light blue) and H<sub>2</sub>O-promoted CH<sub>4</sub> conversion (red). Reaction conditions: 172 nm-140 W Xe<sub>2</sub> excimer lamp, irradiation time 24 hours, ambient temperature; volume of reaction gas 100 mL and volume ratio (CO<sub>2</sub>/ H<sub>2</sub> =2/1) for CO<sub>2</sub> hydrogenation; volume of reaction gas 220 mL and volume of water (1 mL) for CH<sub>4</sub> conversion.

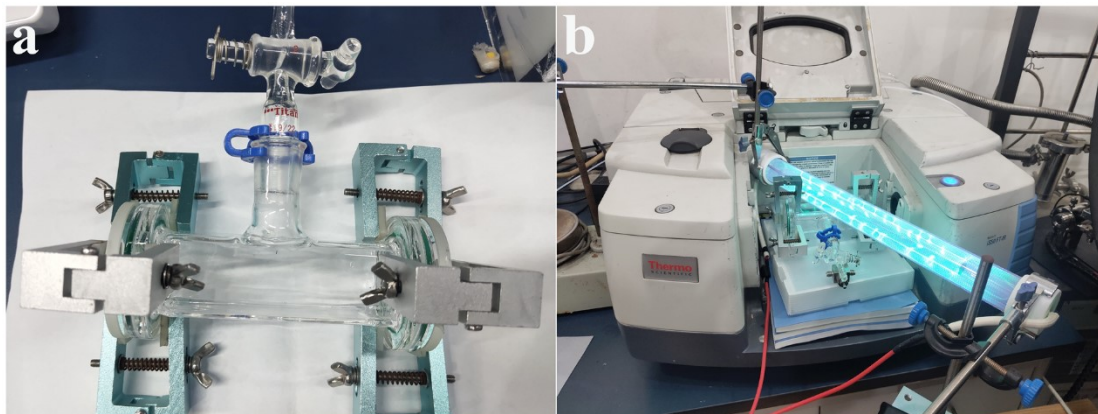

**Figure S4** (a) Photograph of the *in-situ* FT-IR reactor. (b) Photograph of the *in-situ* FT-IR analysis apparatus in VUV photochemistry system.

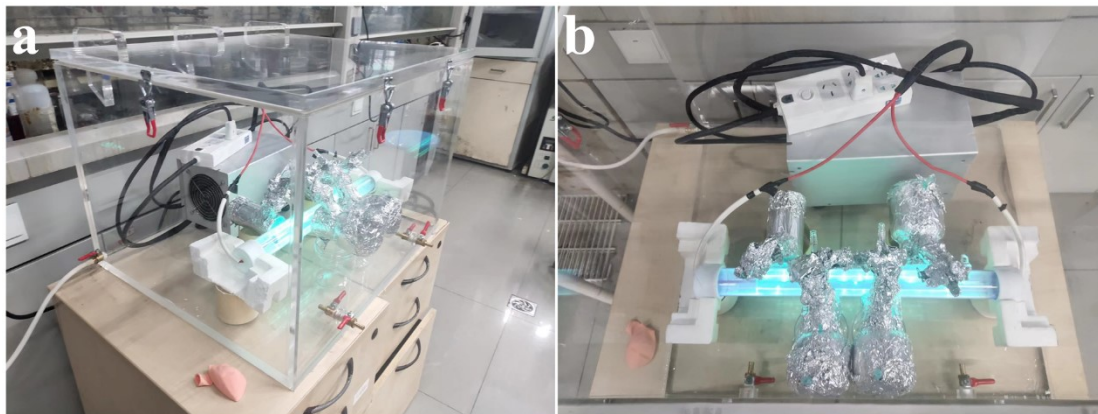

**Figure S5** Photograph of the VUV photochemistry setup in Ar atmosphere.



**Table S1** Representative studies on the CO<sub>2</sub> hydrogenation and CH<sub>4</sub> transformation.

| Catalysts                                                            | Reaction condition                                              | Reactant                          | Production                                 | Time  | Reference |
|----------------------------------------------------------------------|-----------------------------------------------------------------|-----------------------------------|--------------------------------------------|-------|-----------|
| None                                                                 | 140 W Xe <sub>2</sub> excimer lamp                              | CO <sub>2</sub> +H <sub>2</sub>   | CO: 4.8 μmol                               | 24 h  | This work |
| None                                                                 | 140 W Xe <sub>2</sub> excimer lamp                              | CH <sub>4</sub>                   | C <sub>2</sub> H <sub>6</sub> : 10.8 μmol  | 24 h  | This work |
| None                                                                 | 140 W Xe <sub>2</sub> excimer lamp                              | CH <sub>4</sub> +H <sub>2</sub> O | C <sub>2</sub> H <sub>6</sub> : 21.6 μmol  | 24 h  | This work |
| None                                                                 | 140 W Xe <sub>2</sub> excimer lamp +<br>oxygen-free environment | CO <sub>2</sub> +H <sub>2</sub>   | CO: 8.6 μmol                               | 24 h  | This work |
| None                                                                 | 140 W Xe <sub>2</sub> excimer lamp +<br>oxygen-free environment | CH <sub>4</sub> +H <sub>2</sub> O | C <sub>2</sub> H <sub>6</sub> : 40.78 μmol | 24 h  | This work |
| Bismuthine (20 mg)                                                   | 300 W Xe lamp                                                   | CO <sub>2</sub> +H <sub>2</sub> O | CO: 1.432 μmol                             | 5 h   | 1         |
| Ti <sub>3</sub> C <sub>2</sub> dots (1 mg)                           | 150 W Xe lamp +300 °C                                           | CO <sub>2</sub> +H <sub>2</sub>   | CO: 0.143 μmol h <sup>-1</sup>             | /     | 2         |
| rh-In <sub>2</sub> O <sub>3-x</sub> (OH) <sub>y</sub>                | 130 W Xe lamp +270 °C                                           | CO <sub>2</sub> +H <sub>2</sub>   | CO: 22 μmol h <sup>-1</sup>                | /     | 3         |
| Au-ZnO (15 mg)                                                       | 5.5 ns pulsed 532 nm laser                                      | CO <sub>2</sub> +H <sub>2</sub>   | CO: 0.015 μmol                             | 5 h   | 4         |
| Pt/B <sub>4</sub> C/C <sub>3</sub> N <sub>4</sub> (6 mg)             | 300 W Xe lamp                                                   | CO <sub>2</sub> +H <sub>2</sub>   | CH <sub>4</sub> : 0.04 μmol                | 8 h   | 5         |
| Ru/MnO <sub>x</sub>                                                  | 300 W Xe lamp +200 °C                                           | CO <sub>2</sub> +H <sub>2</sub>   | CH <sub>4</sub> : 10 mmol                  | 4 h   | 6         |
| Graphdiyne/In <sub>2</sub> O <sub>3</sub> (5 mg)                     | 150 W Xe lamp (20 sun)                                          | CO <sub>2</sub> +H <sub>2</sub>   | CO: 72 μmol                                | 4 h   | 7         |
| Bi <sub>2</sub> WO <sub>6</sub> (300 mg)                             | 450 W Hg lamp + 55 °C                                           | CH <sub>4</sub> +H <sub>2</sub> O | C <sub>2</sub> H <sub>6</sub> : 0.75 μmol  | 0.5 h | 8         |
| Pt/TiO <sub>2</sub> (75 mg)                                          | UV light                                                        | CH <sub>4</sub> +H <sub>2</sub> O | C <sub>2</sub> H <sub>6</sub> : 23.67 μmol | 6 h   | 9         |
| Pd/TiO <sub>2</sub> (75 mg)                                          | UV light                                                        | CH <sub>4</sub> +H <sub>2</sub> O | C <sub>2</sub> H <sub>6</sub> : 12.38 μmol | 6 h   | 10        |
| BiVO <sub>4</sub> bipyramids (205 mg)                                | 350 W Xe lamp                                                   | CH <sub>4</sub> +H <sub>2</sub> O | CH <sub>3</sub> OH: 22.94 μmol             | 1 h   | 11        |
| Ga <sup>3+</sup> -modified<br>microporous titanosilicate<br>(200 mg) | 150 W high pressure Hg<br>lamp                                  | CH <sub>4</sub>                   | C <sub>2</sub> H <sub>6</sub> : 20.9 μmol  | 5 h   | 12        |
| Ag-HPW/TiO <sub>2</sub> (100 mg)                                     | 400 W Xe lamp                                                   | CH <sub>4</sub>                   | C <sub>2</sub> H <sub>6</sub> : 14.4 μmol  | 7 h   | 13        |

## Supplementary References

1. Wang, B.; Chen, H.; Zhang, W.; Liu, H.; Zheng, Z.; Huang, F.; Liu, J.; Liu, G.; Yan, X.; Weng, Y.-X.; Li, H.; She, Y.; Chu, P. K.; Xia, J., Semimetallic bismuthene with edge-rich dangling bonds: Broad-spectrum-driven and edge-confined electron enhancement boosting CO<sub>2</sub> hydrogenation reduction. *Advanced Materials* **2024**, 2312676.
2. Ramírez-Grau, R.; Cabrero-Antonino, M.; García, H.; Primo, A., MXene dots as photocatalysts for CO<sub>2</sub> hydrogenation. *Applied Catalysis B: Environmental* **2024**, 341, 123316.
3. Yan, T.; Wang, L.; Liang, Y.; Makaremi, M.; Wood, T. E.; Dai, Y.; Huang, B.; Ali, F. M.; Dong, Y.; Ozin, G. A., Polymorph selection towards photocatalytic gaseous CO<sub>2</sub> hydrogenation. *Nature Communications* **2019**, 10 (1), 2521.
4. Wang, C.; Ranasingha, O.; Natesakhawat, S.; Ohodnicki, P. R.; Andio, M.; Lewis, J. P.; Matranga, C., Visible light plasmonic heating of Au–ZnO for the catalytic reduction of CO<sub>2</sub>. *Nanoscale* **2013**, 5 (15), 6968-6974.
5. Zhang, X.; Wang, L.; Du, Q.; Wang, Z.; Ma, S.; Yu, M., Photocatalytic CO<sub>2</sub> reduction over B<sub>4</sub>C/C<sub>3</sub>N<sub>4</sub> with internal electric field under visible light irradiation. *Journal of Colloid and Interface Science* **2016**, 464, 89-95.
6. Zhai, J.; Xia, Z.; Zhou, B.; Wu, H.; Xue, T.; Chen, X.; Jiao, J.; Jia, S.; He, M.; Han, B., Photo-thermal coupling to enhance CO<sub>2</sub> hydrogenation toward CH<sub>4</sub> over Ru/MnO/Mn<sub>3</sub>O<sub>4</sub>. *Nature Communications* **2024**, 15 (1), 1109.
7. Li, W.; Zhang, Y.; Wang, Y.; Ran, W.; Guan, Q.; Yi, W.; Zhang, L.; Zhang, D.; Li, N.; Yan, T., Graphdiyne facilitates photocatalytic CO<sub>2</sub> hydrogenation into C<sub>2+</sub> hydrocarbons. *Applied Catalysis B: Environmental* **2024**, 340, 123267.
8. Murcia-López, S.; Villa, K.; Andreu, T.; Morante, J. R., Partial oxidation of methane to methanol using bismuth-based photocatalysts. *ACS Catalysis* **2014**, 4 (9), 3013-3019.
9. Yu, L.; Shao, Y.; Li, D., Direct combination of hydrogen evolution from water and methane conversion in a photocatalytic system over Pt/TiO<sub>2</sub>. *Applied Catalysis B: Environmental* **2017**, 204, 216-223.
10. Yu, L.; Li, D., Photocatalytic methane conversion coupled with hydrogen evolution from water over Pd/TiO<sub>2</sub>. *Catalysis Science & Technology* **2017**, 7 (3), 635-640.
11. Zhu, W.; Shen, M.; Fan, G.; Yang, A.; Meyer, J. R.; Ou, Y.; Yin, B.; Fortner, J.; Foston, M.; Li, Z.; Zou, Z.; Sadtler, B., Facet-dependent enhancement in the activity of bismuth vanadate microcrystals for the photocatalytic conversion of methane to methanol. *ACS Applied Nano Materials* **2018**, 1 (12), 6683-6691.
12. Li, L.; Cai, Y.-Y.; Li, G.-D.; Mu, X.-Y.; Wang, K.-X.; Chen, J.-S., Synergistic effect on the photoactivation of the methane C-H Bond over Ga<sup>3+</sup>-modified ETS-10. *Angewandte Chemie International Edition* **2012**, 51 (19), 4702-4706.
13. Yu, X.; Zholobenko, V. L.; Moldovan, S.; Hu, D.; Wu, D.; Ordonsky, V. V.; Khodakov, A. Y., Stoichiometric methane conversion to ethane using photochemical looping at ambient temperature. *Nature Energy* **2020**, 5 (7), 511-519.
